# Supplementary material for: Comparative analysis identifies amino acids critical for citrus tristeza virus (T36CA) encoded proteins involved in suppression of RNA silencing and differential systemic infection in two plant species
Source: PubMed Central journal article supplement — Mol Plant Pathol. 2020 Oct 29;22(1):64–76. doi: 10.1111/mpp.13008 (PMC7749750; doi:10.1111/mpp.13008), 2020-10-29
Supplement: MPP-22-64-s001.pdf [file MPP-22-64-s001.pdf]

(a)

|           |                                                               |     |
|-----------|---------------------------------------------------------------|-----|
| T36FL     | ATGAGCTTTTCGGCGCTTGTGGTTAAAGGTTATGGCTGTAGTTACGGTATTATGGTACGGT | 60  |
| T36CA-V0  | -----                                                         | 60  |
| T36CA-ori | -----                                                         | 60  |
| T36FL     | AAAGAGCCTTCCATTAGTGAAGGTTACAATGCTCTCATGAATGACTTTAAGTTTATC     | 120 |
| T36CA-V0  | -----                                                         | 120 |
| T36CA-ori | -----                                                         | 120 |
| T36FL     | GATACGCATTTTACAAACGTTTCTTACGCTAAGAAATGTTACGATTTGGCTAATTTTCGAT | 180 |
| T36CA-V0  | -----T-----                                                   | 180 |
| T36CA-ori | -----T-----                                                   | 180 |
| T36FL     | TTAGACTTTCTACGCATCGTTATCATTCCTTTGAGTGGGGGTACGGTGAATGAATCGCGT  | 240 |
| T36CA-V0  | -----T-----                                                   | 240 |
| T36CA-ori | -----T-----                                                   | 240 |
| T36FL     | GCTGATCGCACTAACGTTTCAGAAATTGTCGAATCGCATGTGAGCGACCGAGACAGGATG  | 300 |
| T36CA-V0  | -----                                                         | 300 |
| T36CA-ori | -----C-----C-----                                             | 300 |
| T36FL     | AGCATCTTGTTGCGTAATAAGCGGATCCAAATTCCTTCGCTCTTACCTTGGGATAACTAG  | 360 |
| T36CA-V0  | -----                                                         | 360 |
| T36CA-ori | -----                                                         | 360 |

**R93H**

**Figure S1.** Sequence comparison of the p13 and p20 coding regions between T36CA-ori and T36CA-V0. Nucleotide (nt) sequences of the p13 and p20 coding regions in T36CA-ori and T36CA-V0 were aligned with those of T36FL using the Clustal Omega program (<https://www.ebi.ac.uk/Tools/msa/clustalo/>). (a) The alignment of nt sequences of p13. (b) The alignment of nt sequences of p20. Nucleotide variants in T36CA-ori and/or T36CA-V0 are indicated in red. Non-synonymous nt variants are highlighted in blue; indicated below them are the resulting change in deduced amino acids (in bold).

(b)

|           |                                                               |     |
|-----------|---------------------------------------------------------------|-----|
| T36FL     | ATGCGAGCTTACTTTAGTGTTAATGATTACATAAGCCTTTTGGCTAAGGTCAGCGCTGTT  | 60  |
| T36CA-V0  | -----G-----                                                   | 60  |
| T36CA-ori | -----G-----C-----                                             | 60  |
|           | <b>G18S</b> <b>A20V</b>                                       |     |
| T36FL     | GTGGAACGTTTATGCGATCCCAGCGTAACTCTTGC GGAAGTGATGGACGAAATTAATGAC | 120 |
| T36CA-V0  | -----C-----                                                   | 120 |
| T36CA-ori | -----                                                         | 120 |
| T36FL     | TTTAACTCGTTTCTCGCTTTAGTGCACTCTATGAAGTCAGACATGAACGGAGACCATCAG  | 180 |
| T36CA-V0  | -----A-----                                                   | 180 |
| T36CA-ori | -----G-----A-----                                             | 180 |
|           | <b>D56N</b>                                                   |     |
| T36FL     | GATGGCCACCACGAGATGGGTGAACACAAGTCTCGGTTGTTATGCAACATAGAGGCGAAA  | 240 |
| T36CA-V0  | -----                                                         | 240 |
| T36CA-ori | -----                                                         | 240 |
| T36FL     | TTGCGAGTACTTCTCGACATCATAAGACGTCGGTTCCTCGCGACAAGCTGCTCTGTACT   | 300 |
| T36CA-V0  | -----                                                         | 300 |
| T36CA-ori | -----C-----                                                   | 300 |
|           | <b>S81L</b>                                                   |     |
| T36FL     | AGCGCGACAGATGTCATGGGCTTCTTTGTAATGAGGTACATGAGTTCTAGCCACACCAGC  | 360 |
| T36CA-V0  | -----A-----                                                   | 360 |
| T36CA-ori | -----                                                         | 360 |
|           | <b>S107G</b>                                                  |     |
| T36FL     | TTCGAATCCGTAATGAGGACGGAGTTGAGGTTGGTGGTTAAGGCGGTACTGTCGGATTTA  | 420 |
| T36CA-V0  | -----                                                         | 420 |
| T36CA-ori | -----                                                         | 420 |
| T36FL     | TCCCGCGCGCATAAACTGGATTTTAGCGAGCGAGCTTTTGC GGCTTATGGTATCCTTTTG | 480 |
| T36CA-V0  | -----                                                         | 480 |
| T36CA-ori | -----                                                         | 480 |
| T36FL     | CAAAGGGTACTGTGTCGACCGTTTGC GGTCAGTTTGACATTAATTTAGTCTCTCCATCT  | 540 |
| T36CA-V0  | -----                                                         | 540 |
| T36CA-ori | -----                                                         | 540 |
| T36FL     | TGCGTGTAG                                                     | 549 |
| T36CA-V0  | -----                                                         | 549 |
| T36CA-ori | -----                                                         | 549 |
