# Supplementary material for: Comparative analysis identifies amino acids critical for citrus tristeza virus (T36CA) encoded proteins involved in suppression of RNA silencing and differential systemic infection in two plant species
Source: PubMed Central journal article supplement — Mol Plant Pathol. 2020 Oct 29;22(1):64–76. doi: 10.1111/mpp.13008 (PMC7749750; doi:10.1111/mpp.13008), 2020-10-29
Supplement: MPP-22-64-s004.pdf [file MPP-22-64-s004.pdf]

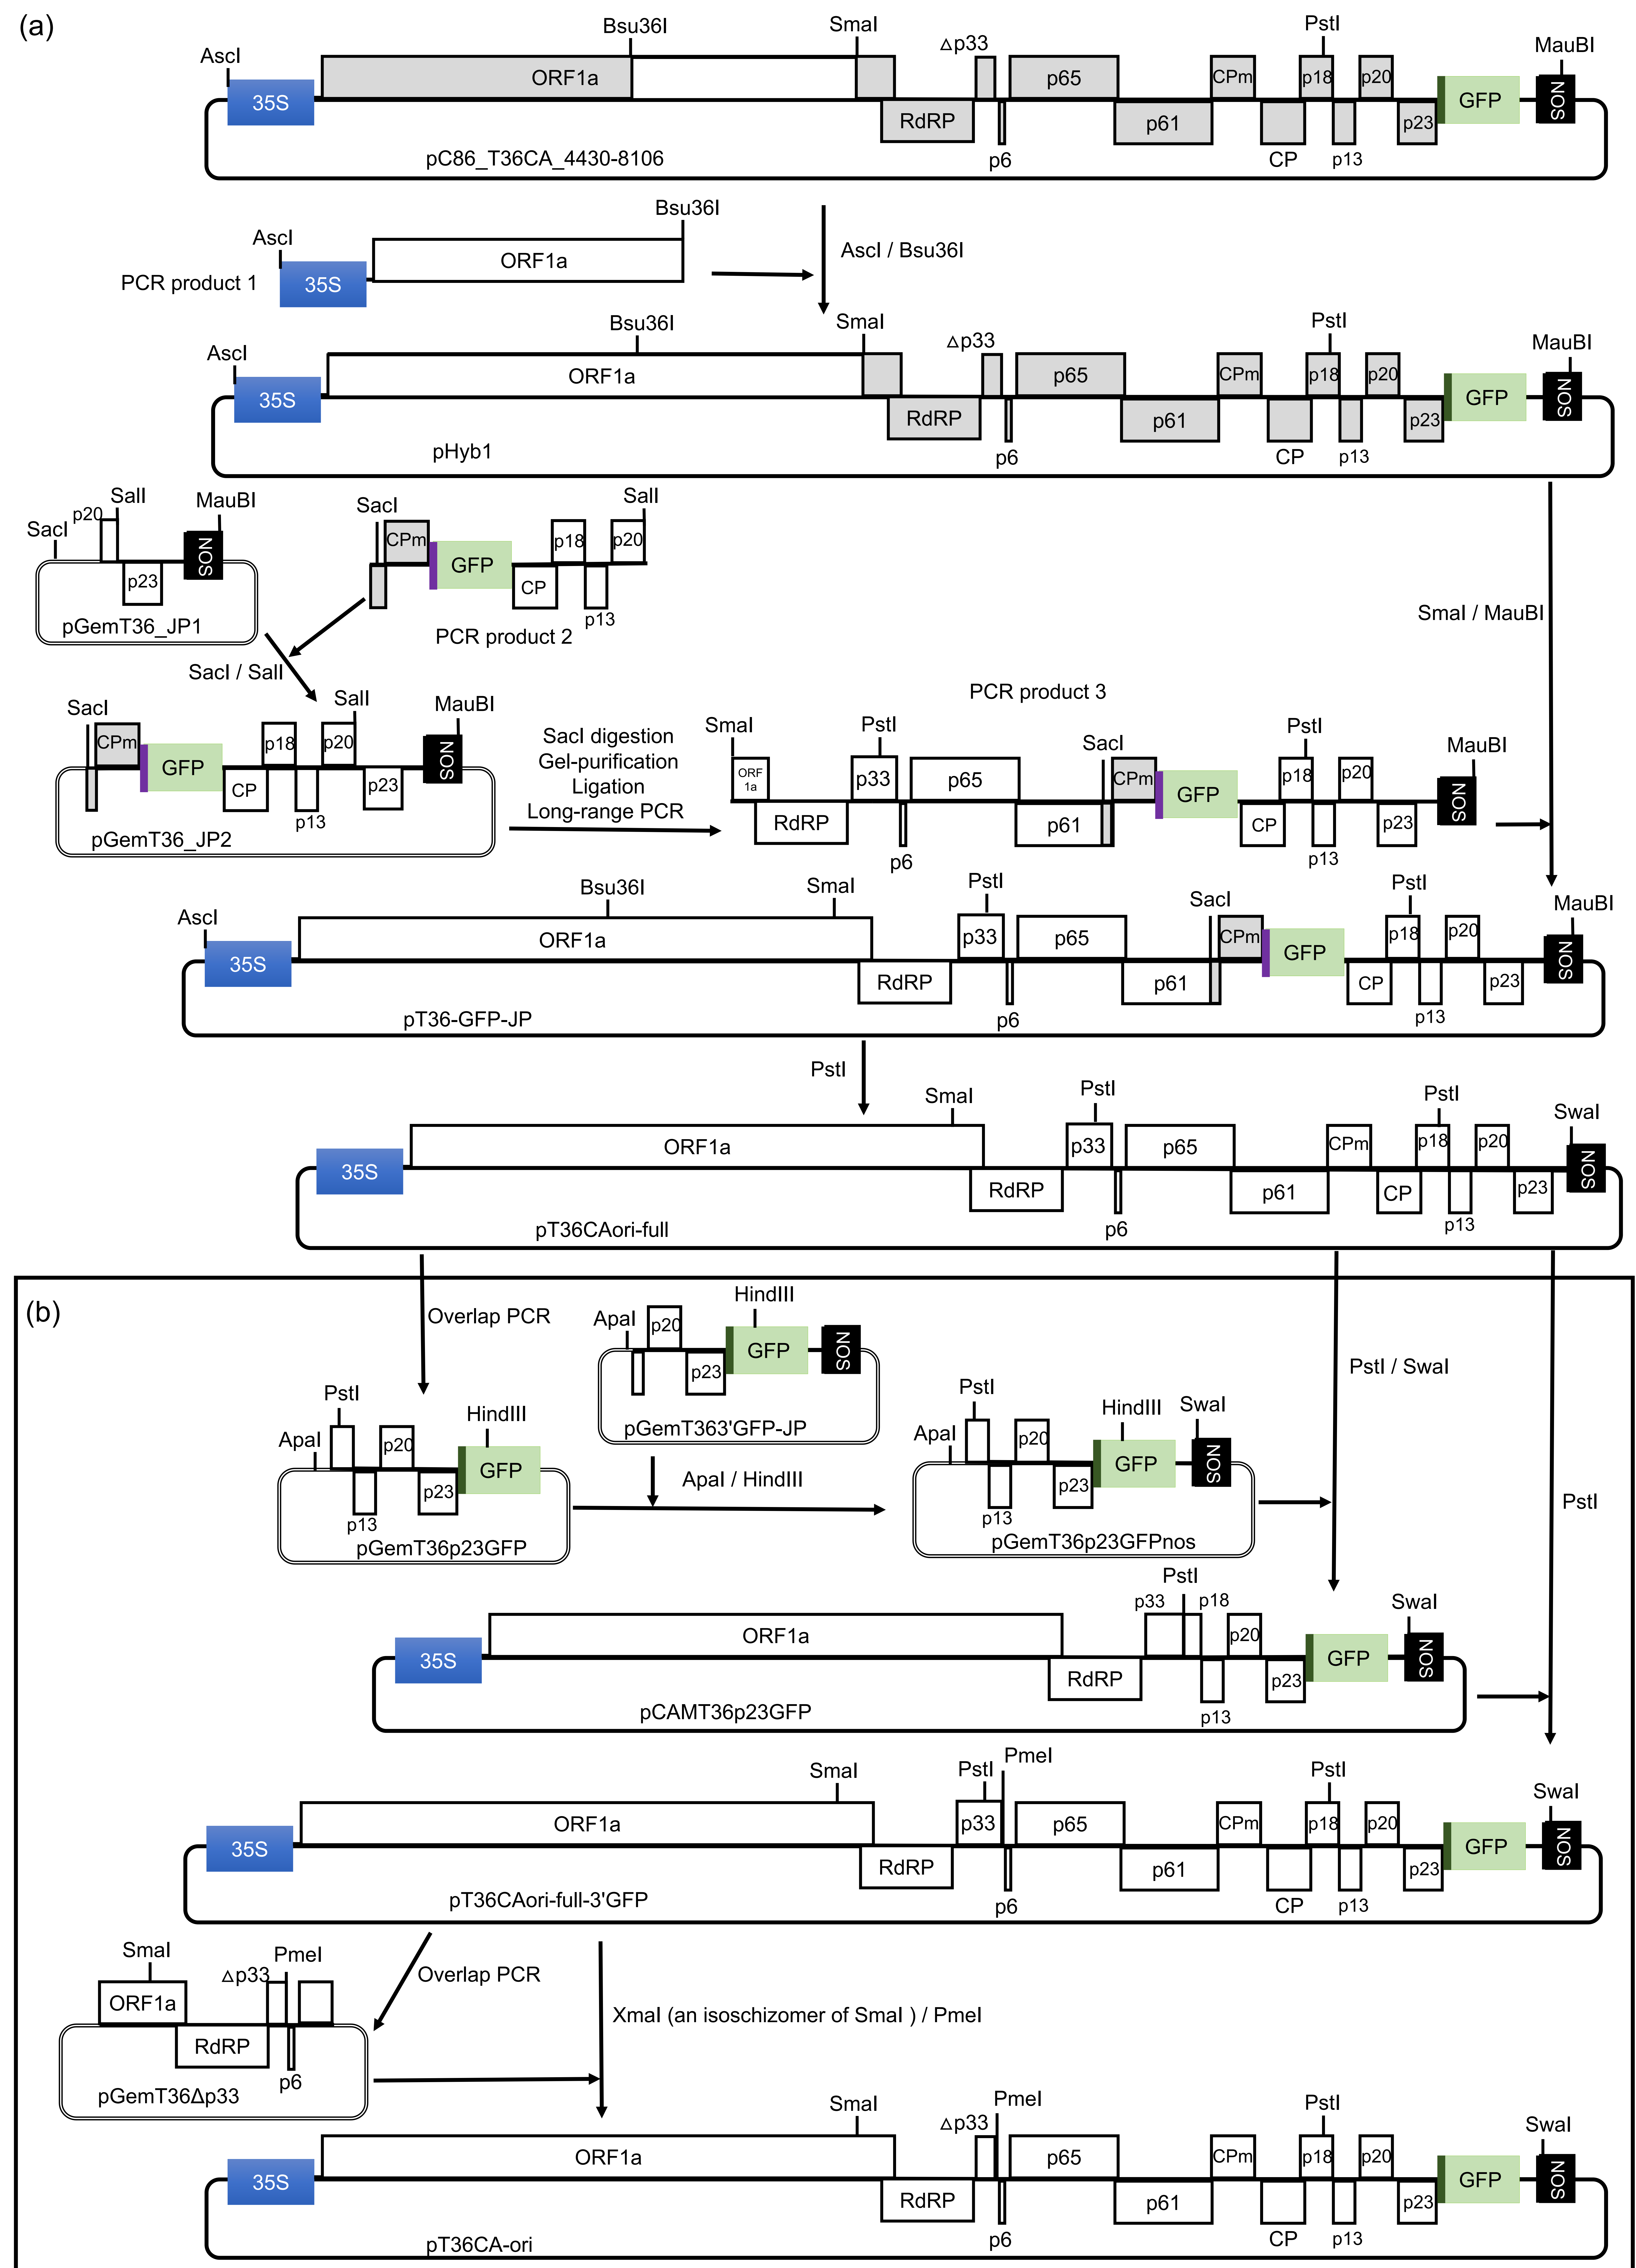

**Figure S4.** Schematic procedure for cloning the pT36CA-ori construct/prototype vector. A two-part procedure was used to engineer pT36CA-ori. (a) Part I of the cloning procedure generated the intermediate binary plasmids, pHyb1 and pT36CAori-full. (b) Part II of the cloning procedure led to the construction of the binary plasmid/prototype vector pT36CA-ori. Gray and white boxes represent the CTV open reading frames (ORFs) that originated from the C86 (pT36FL) binary plasmid (El-Mohtar and Dawson, 2014) and T36CA cDNA clones (Chen *et al.*, 2018), respectively. Names of ORFs are as described in Fig. 1. Black boxes represent the region containing a ribozyme sequence and nopaline synthase (NOS) terminator. The cauliflower mosaic virus 35S promoter (35S) and a coding region of green fluorescence protein (GFP) are as illustrated. Bars in purple and dark green represent the controller element of the beet yellows virus (BYV) and citrus tristeza virus (CTV) major coat protein, respectively. The restriction enzymes used for cloning and their locations are as shown. The name of each cloned DNA (made up of a combination of letter and numerical identifiers preceded by the letter “p”) or PCR product is indicated at the bottom of, or next to, each illustration.
